# Supplementary material
Source: Elsevier journal article supplement (https://www.sciencedirect.com/science/article/pii/S2530064421000225)
Supplement: mmc1 [file S2530064421000225:mmc1.docx]

**Are invasive marmosets harmful to Atlantic Forest birds?** – Zaluar and Vale

**Supporting information**

**Table S1:** Word combination used and associated papers used in the literature survey in the three bibliographic databases (Web of Science, Scopus and Scielo).

| **Word Combination** | **Papers** | **Papers used** |
| --- | --- | --- |
| *Web of Science* | | |
| “Callithrix AND bird” | 56 | (Lyra-neves et al., 2007; Galetti et al., 2009; Vilela and Del-Claro, 2011; Alexandrino et al., 2012; Borges et al., 2018) |
| “Callithrix AND mammal” | 258 | (Vilela and Del-Claro, 2011; Amora et al., 2014; Camargo et al., 2016) |
| “Callithrix AND amphibian” | 7 | None |
| “Callithrix AND reptile” | 5 | None |
| “Callithrix AND fish” | 62 | None |
| “Callithrix AND frog” | 6 | None |
| “Callithrix AND lizard” | 4 | None |
| “Callithrix AND vertebrate” | 76 | (Abreu et al., 2016; Camargo et al., 2016) |
| “Callithrix AND invertebrate” | 9 | (Vilela, 2007; Silva et al., 2017) |
| “Callithrix AND predation” | 51 | (Lyra-neves et al., 2007; Galetti et al., 2009; Schiel et al., 2010; Alexandrino et al., 2012; Camargo et al., 2016; Borges et al., 2018) |
| “Callithrix AND feeding” | 176 | (Vilela and Del-Claro, 2011; Abreu et al., 2016; Camargo et al., 2016; Silva et al., 2017) |
| “Callithrix AND competition” | 82 | (Braz et al., 2019; Lyra-Neves et al., 2007; Oliveira and Grelle, 2012) |
| “Callithrix AND feces” | 44 | (Silva et al., 2017) |
| *Scopus* | | |
| “Callithrix AND bird” | 44 | (Miranda and Faria, 2001; Lyra-neves et al., 2007; Galetti et al., 2009; Vilela and Del-Claro, 2011) |
| “Callithrix AND mammal” | 374 | (Vilela and Del-Claro, 2011; Amora et al., 2014; Abreu et al., 2016; Camargo et al., 2016) |
| “Callithrix AND amphibian” | 3 | None |
| “Callithrix AND reptile” | 7 | None |
| “Callithrix AND fish” | 62 | None |
| “Callithrix AND frog” | 7 | None |
| “Callithrix AND lizard” | 5 | (Melo et al., 2018) |
| “Callithrix AND vertebrate” | 55 | (Cunha et al., 2006; Abreu et al., 2016; Camargo et al., 2016) |
| “Callithrix AND invertebrate” | 8 | (Vilela, 2007; Silva et al., 2017) |
| “Callithrix AND predation” | 55 | (Cunha et al., 2006; Lyra-neves et al., 2007; Galetti et al., 2009; Alexandrino et al., 2012; Amora et al., 2014; Camargo et al., 2016; Beltrão-Mendes et al., 2018; Borges et al., 2018) |
| “Callithrix AND feeding” | 192 | (Rylands, 1996; Miranda and Faria, 2001; Vilela and Faria, 2004; Cunha et al., 2006; Vilela and Del-Claro, 2011; Pinheiro and Mendes Pontes, 2015; Abreu et al., 2016; Camargo et al., 2016; Silva et al., 2017) |
| “Callithrix AND competition” | 72 | (Braz et al., 2019; Oliveira and Grelle, 2012) |
| “Callithrix AND feces” | 106 | (Silva et al., 2017) |
| *Scielo* | | |
| “Callithrix AND bird” | 6 | (Miranda and Faria, 2001; Lyra-neves et al., 2007; Galetti et al., 2009; Alexandrino et al., 2012) |
| “Callithrix AND mammal” | 3 | None |
| “Callithrix AND amphibian” | 0 | None |
| “Callithrix AND reptile” | 0 | None |
| “Callithrix AND fish” | 0 | None |
| “Callithrix AND frog” | 0 | None |
| “Callithrix AND lizard” | 0 | None |
| “Callithrix AND vertebrate” | 0 | None |
| “Callithrix AND invertebrate” | 1 | (Vilela, 2007) |
| “Callithrix AND predation” | 3 | (Lyra-neves et al., 2007; Galetti et al., 2009; Alexandrino et al., 2012) |
| “Callithrix AND feeding” | 7 | (Vilela and Faria, 2004) |
| “Callithrix AND competition” | 4 | (Lyra-Neves et al., 2007) |
| “Callithrix AND feces” | 4 | None |

**Table S2:** Studies that recorded bird predation by marmosets within their native and invaded ranges. Predator (marmoset): *Callithrix jacchus* (J), *C. penicillata* (P), and hybrid between the two species (H); Predator range type (native or invasive).

| **Study** | **Study objective** | | **Number of records of bird predation** | **Number of species of birds preyed** | **Bird competition record** | **Item preyed** | **predator (marmoset)** | |
| --- | --- | --- | --- | --- | --- | --- | --- | --- |
| **Native Range** | | | | | | | | |
| Borges et al. (2018) | marmosets vs. birds interactions | 1 | | 1 | Yes | adult | | J |
| Lyra-Neves et al. (2007) | marmosets vs. birds interactions | 28 | | 11 | Yes | NA | | J |
| Miranda and Faria (2001) | general marmoset diet | NA | | NA | No | eggs | | P |
| Schiel et al. (2010) | general marmoset diet | NA | | NA | No | juvenile | | J |
| Abreu et al. (2016) | general marmoset diet | 1 | | NA | No | egg | | J |
| Vilela and Del-Claro (2011) | general marmoset diet | NA | | NA | No | eggs | | P |
| Silva et al. (2008) | opportunistic observations of marmoset predation | 1 | | 1 | No | adult | | P |
| Mendes Pontes and Soares (2005) | impact of nest predators on birds* | NA | | 1 | No | nestling, eggs | | J |
| **Invaded Range** | | | | | | | | |
| Miranda (2016) | impact of nest predators on birds | 5 | | NA | No | artificial nests with quail eggs | | J, P, H |
| Coimbra-Filho and Aldrighi (1971) apud Silva et al. (2017) | NA | NA | | 2 | NA | NA | | J |
| Ballarini (2016) | impact of nest predators on birds | 19 | | 2 | No | natural nests, inactive nests with canary eggs | | J, P, H |
| Patiu (2017) | impact of nest predators on birds | 9 | | 1 | No | natural nests, inactive nests with canary eggs | | J, P, H |
| Cunha et al. (2006)* | opportunistic observations of marmoset predation | 1 | | NA | No | adult | | J |
| Galetti et al. (2009)* | opportunistic observations of marmoset predation | 1 | | 1 | No | juvenile | | P |
| Gomes and Lima-Gomes (2011) | opportunistic observations of marmoset predation | 2 | | 1 | No | nestling | | P |
| Begotti and Landesmann (2008) | opportunistic observations of marmoset predation | NA | | 1 | No | eggs | | J, P, H |
| Alexandrino et al. (2012) | opportunistic observations of marmoset predation | 2 | | 1 | No | juvenile | | P |

*Although Galetti et al. (2009) and Cunha et al. (2006) had the objectives of measuring the impact of nest predators on birds and of describing marmoset diet, none have recorded marmoset bird predation with their sampling design, but reported a opportunistic observations of bird predation during the field work.
